# Supplementary material for: Identification of Genes Involved in the Responses of Tangor(C. reticulata×C. sinensis)to Drought Stress
Source: Hindawi journal article supplement (doi:10.1155/2017/8068725), 2017-01-01
Supplement: f1 [file 8068725.f1.pdf]

# Supporting Information

**Table S1** Primers of selected genes used for qRT-PCR analysis and their amplification size.

| Name   | Predict coding protein                | Primer sequence (5'-3')                              | Product length (bp) |
|--------|---------------------------------------|------------------------------------------------------|---------------------|
| TDF4   | Phosphatase 2C                        | F: ATACCGAGACCATGAACAAG<br>R: AGTGGATGAAGAGGACAAA    | 169                 |
| TDF13  | Cytochrome P450 monooxygenase         | F: TACCTCTTCTGCGTTCTTGT<br>R: CTGCGTACCTAATACCAGTAAA | 109                 |
| TDF24  | fructose-bisphosphate aldolase        | F: AATACATCTCTGGTGCCATC<br>R: AGTCCTGACCGACTTTGATA   | 123                 |
| TDF26  | D-alanyl-d-alanine carboxypeptidase   | F: TGGAGGAAATGTTAAACGAG<br>R: CCTAATCGCCACAATATCAT   | 179                 |
| TDF33  | ATP binding protein                   | F: TACGGTGAAACCAATACTCC<br>R: CGAAATCAGACATTCTCTC    | 157                 |
| TDF34  | 26S proteasome subunit RPN2b          | F: GCAGTAGGTATCTCCTGTGC<br>R: GACTGCGTACCTAATCTGGA   | 144                 |
| TDF38  | cyclic nucleotide-gated ion channel   | F: CTTGAAATTTGTAGCCTCTCA<br>R: TGCTTGATGAAACATGCTG   | 112                 |
| TDF42  | pyruvate kinase                       | F: GCGTCAAGAATCTACTCACC<br>R: TAGAGTCTTGGGCTCTCAAA   | 180                 |
| TDF43  | dihydrolipoamide dehydrogenase        | F: TCTTAGCTGGTAAACATGGC<br>R: CCAAGTTCCTTTACCTGCTC   | 112                 |
| TDF60  | MutT-like protein                     | F: GGATCTTGAAGTTCTCGTCA<br>R: CTCGTAAAGCTGCTTCTTGT   | 104                 |
| TDF464 | zinc finger protein                   | F: GTACCAAGGACTTCTTCGC<br>R: TGGGAAATCTTCAACAAATC    | 113                 |
| TDF72  | BAK1 precursor                        | F: CAACATGGACCTAACATCCT<br>R: AATGGGTATGAGGAGCAAAT   | 105                 |
| TDF82  | Hypoxia-responsive family protein     | F: CCTAATGCCTCCTCAGATAA<br>R: CGCACACAAGGATTAAATAAC  | 111                 |
| TDF92  | Hypoxia-responsive family protein     | F: CGCACACAAGGATTAAATAAC<br>R: CCTAATGCCTCCTCAGATAA  | 111                 |
| TDF99  | mitochondrial carrier                 | F: ATGAGTCCTGACCGAATACA<br>R: CAACTGTTTCCATCCTTGAT   | 112                 |
| TDF109 | pyridoxal biosynthesis                | F: GGTGTGATGGAGTGTGTTGT<br>R: GTACCTAATGCCCACCATAG   | 158                 |
| TDF115 | Iron-sulfur cluster assembly scaffold | F: CTGACCGACAAGAGCGAT<br>R: TGCCACTCAAACAGATACAG     | 156                 |
| TDF120 | beta-amylase                          | F: CTGACCGACACCATGTTTAT<br>R: GAATGGACCTTTCAGATGAG   | 104                 |
| TDF126 | Hydroxyphenylpyruvate                 | F: GCGTACCTAATCGTGAAGTC                              | 168                 |

|           |               |                         |     |
|-----------|---------------|-------------------------|-----|
|           | reductase     | R: GCTGTGCTTTCTAAATGGTT |     |
| TDF136    | XTH protein 9 | F: GGGTACTGGGTATCTCGATT | 116 |
|           | precursor     | R: GGGAGGCAAATAATTATCAA |     |
| Reference | Citrus actin  | F: GGAGTTCATTGTAGAAGGTG | 200 |
|           |               | R: GCGGGTGTCCCCAGTAT    |     |

3

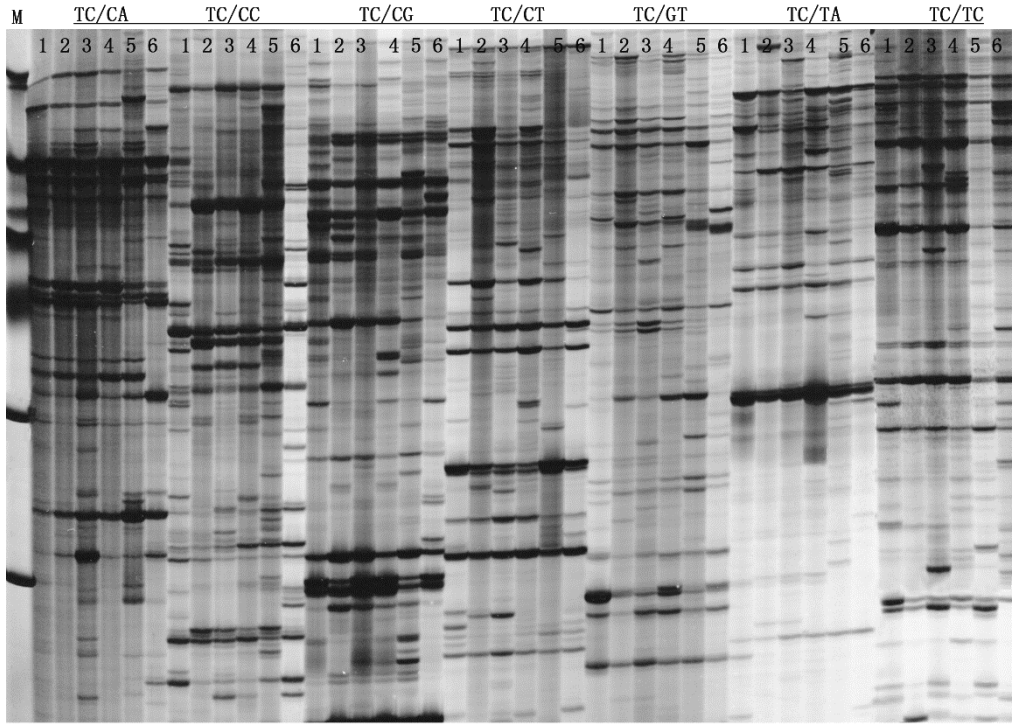

4

5 **Figure S1** A representative picture of a silver-stained cDNA-AFLP gel showing the  
6 transcripts in tangor leaves in response to drought stress using one *Ase* I selective primer  
7 (*Ase* I-TC) and seven *Taq* I selective primers (*Taq*I-CA, CC, CG, CT, GT, TA and TC). 1~6:  
8 0, 3, 5, 8, 11 and 14 day after drought treatment, respectively; M: molecular weight marker.  
9 Lane 6 was only the reference and not used for results analysis.

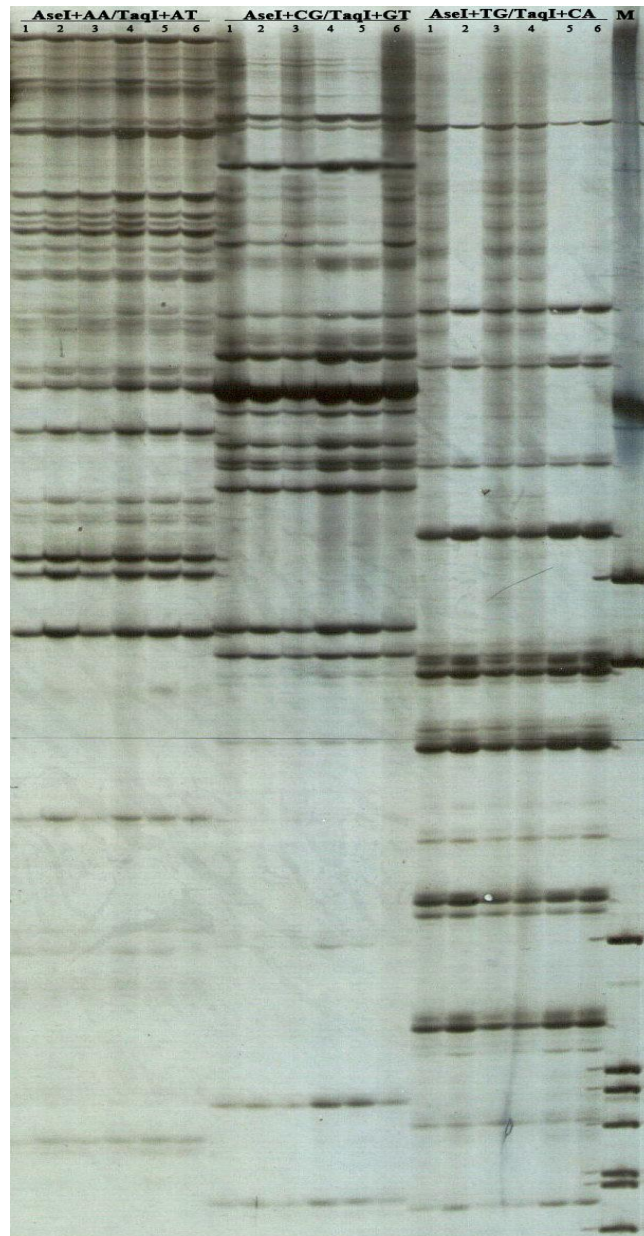

**Figure S2** A cDNA-AFLP profile of control plants across the drought period. Three pair of primer combinations (*AseI+AA/TaqI+AT*, *AseI+CG/TaqI+GT* and *AseI+TG/TaqI+CA*) were randomly selected to perform the cDNA-AFLP procedure. 1~6: 0, 3, 5, 8, 11 and 14 day on control plants, respectively; M: molecular weight marker. Lane 6 was only the reference and not used for results analysis.
